# Supplementary material for: Atomic single layer graphitic-C3N4: fabrication and its high photocatalytic performance under visible light irradiation
Source: Royal Society of Chemistry journal article supplement (doi:10.1039/c3ra45776a), 2013-10-26
Supplement: c3ra45776a.pdf [file c3ra45776a.pdf]

## Supporting information

# Atomic Single Layer Graphitic-C<sub>3</sub>N<sub>4</sub> : Fabrication and Its High Photocatalytic Performance Under Visible Light Irradiation

Huanxin Zhao, Hongtao Yu, Xie Quan\*, Shuo Chen, Huimin Zhao, Hua Wang

### Table of contents

#### 1 Experimental details

#### 2 Morphology of the samples

#### 3 The structure and component of the samples

#### 4 Optical absorption

#### 5 Mechanism of photocatalysis

#### 6 Photocatalytic degradation of phenol

#### 1 Experimental details

**Preparation of N-TiO<sub>2</sub>:** 4 mL of tetrabutyl titanate and 2 mL glacial acetic acid were added into 25 mL ethanol under stirring. The obtained mixture was then combined with another solution composed of 15 mL water, 3 mL ethanol and 1.4 g urea. The sol turned to gel in oven at 80 °C for 8 h and then heated at 400 °C for 1.5 h.

**Preparation of BiVO<sub>4</sub>:** 1.94 g Bi(NO<sub>3</sub>)<sub>3</sub>·5H<sub>2</sub>O and 0.47 g NH<sub>4</sub>VO<sub>3</sub> were mixed in a HNO<sub>3</sub> solution with the concentration of 1.84 M. The mixture was heated at 90 °C for 8 h.

**Preparation of CdS:** CdS was synthesized by a hydrothermal method at 200 °C for 8 h with the CdCl<sub>2</sub> and thiocarbamide as precursor. The molar ratio between CdCl<sub>2</sub> and thiocarbamide was 1:3 and the concentration of CdCl<sub>2</sub> was 1 mM.

**Preparation of bulk g-C<sub>3</sub>N<sub>4</sub>:** the fabrication procedure can be found in our previous work<sup>1</sup>. 5g of melamine was heated at 520 °C for 4 h with the temperature increasing rate of 5 °C min<sup>-1</sup>.

#### 2 Morphology of samples

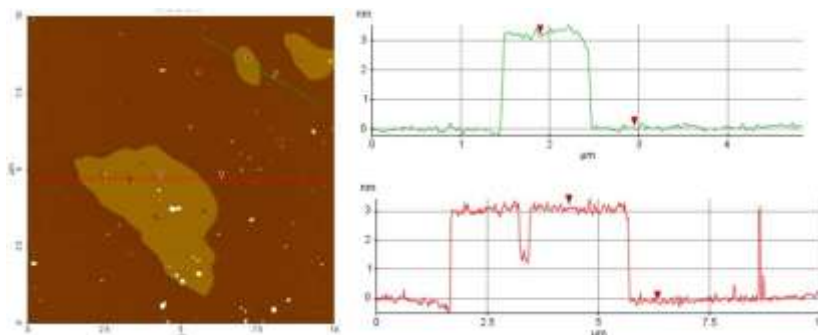

Figure S1 AFM image of g-C<sub>3</sub>N<sub>4</sub> NS.

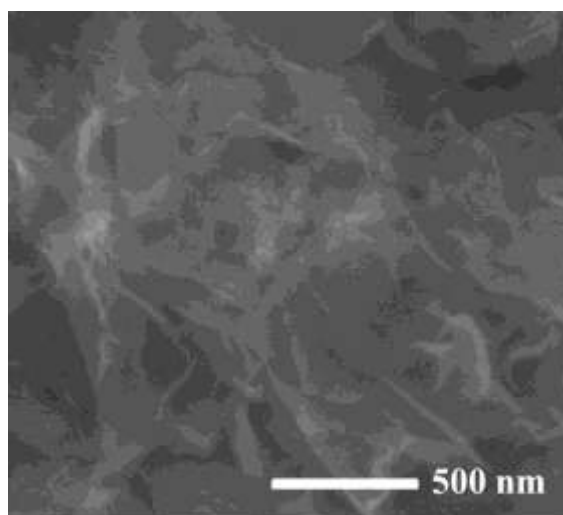

Figure S2 SEM image of SL g-C<sub>3</sub>N<sub>4</sub>.

### 3 The structure and component of the samples

The compositions and chemical states of both SL g-C<sub>3</sub>N<sub>4</sub> and the bulk g-C<sub>3</sub>N<sub>4</sub> were investigated by XPS and the results were shown in Figure S3. Figure S3 (a) shows the C 1s peak which can be deconvoluted into two peaks at 284.6 and 288.0 eV. The first peak was attributed to the graphitic carbon which came from the pure carbonaceous environment adsorbed on the surface. The second peak was assigned to carbon atoms bonded to three nitrogen atoms in the both bulk g-C<sub>3</sub>N<sub>4</sub> and SL g-C<sub>3</sub>N<sub>4</sub> lattice. In the N 1s spectrum (Figure S3 (b,c)) several binding energies can be separated. The main signal showed occurrence of C–N–C groups (398.5 eV) and tertiary nitrogen N–(C)<sub>3</sub> groups (399.3 eV). Deconvolution of the XPS signals also revealed a weak additional signal at 400.7 eV, indicative of amino functions carrying hydrogen (C–N–H). The peak at 404.1 eV was attributed to charging effects<sup>2</sup>. Overall there were no obvious differences between bulk g-C<sub>3</sub>N<sub>4</sub> and the SL g-C<sub>3</sub>N<sub>4</sub> for both C 1s and N 1s XPS spectra which indicated the chemical states of both C and N in SL g-C<sub>3</sub>N<sub>4</sub> were as same as in bulk g-C<sub>3</sub>N<sub>4</sub>.

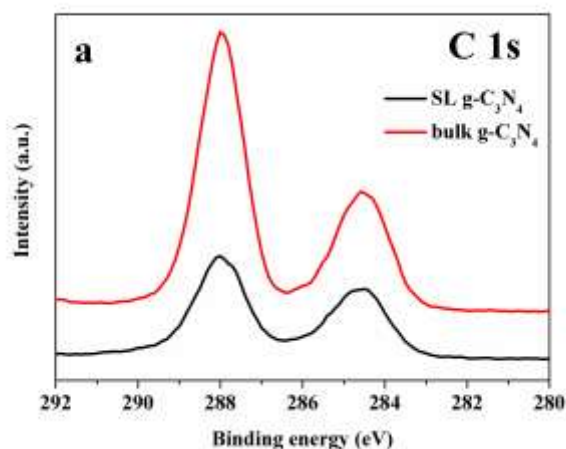

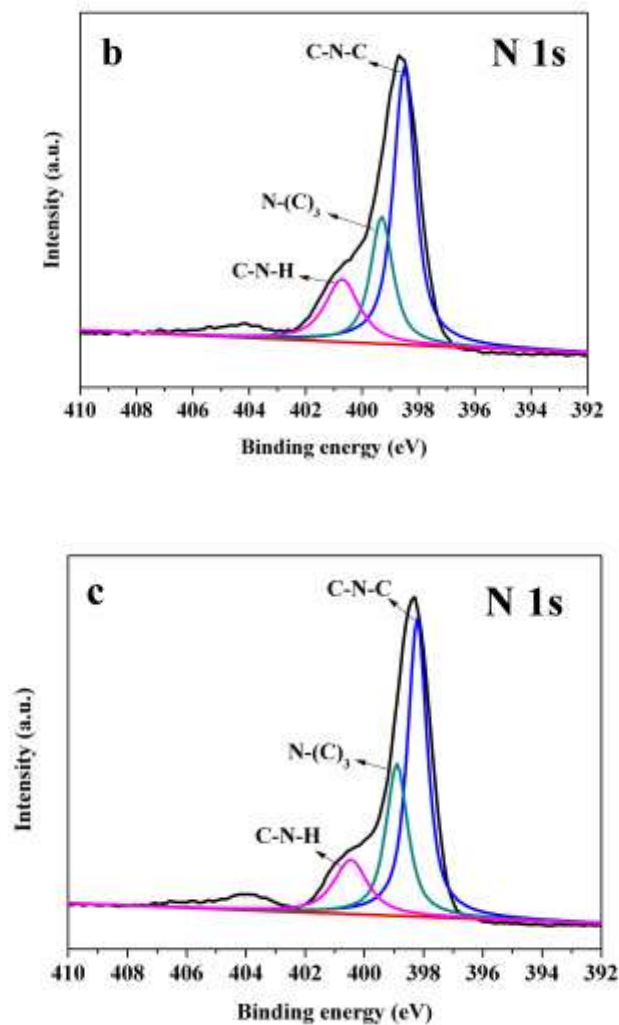

Figure S3 XPS spectra: (a) C 1s of bulk g-C<sub>3</sub>N<sub>4</sub> and SL g-C<sub>3</sub>N<sub>4</sub>, (b) N 1s of bulk g-C<sub>3</sub>N<sub>4</sub>, (c) N 1s of SL g-C<sub>3</sub>N<sub>4</sub>.

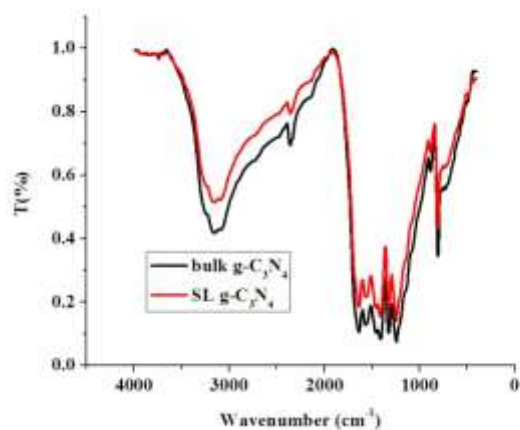

Figure S4 FTIR spectra of bulk g-C<sub>3</sub>N<sub>4</sub> and the SL g-C<sub>3</sub>N<sub>4</sub>.

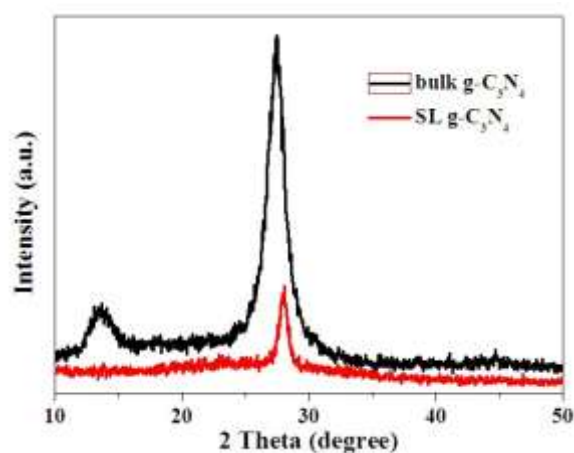

Figure S5 XRD patterns of bulk  $\text{g-C}_3\text{N}_4$  and the SL  $\text{g-C}_3\text{N}_4$ .

#### 4 Optical absorption

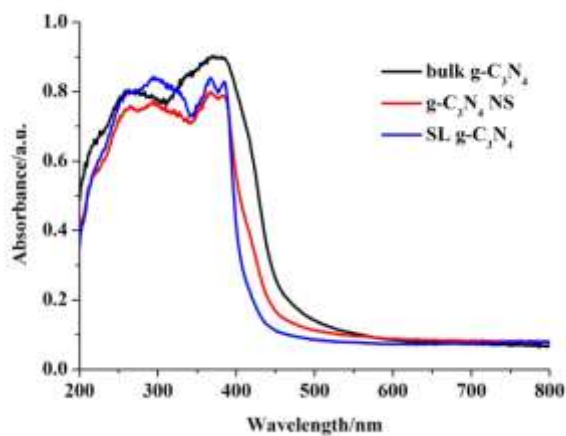

Figure S6 UV-visible absorption spectra of bulk  $\text{g-C}_3\text{N}_4$ ,  $\text{g-C}_3\text{N}_4$  NS and the SL  $\text{g-C}_3\text{N}_4$

#### 5 Mechanism of photocatalysis

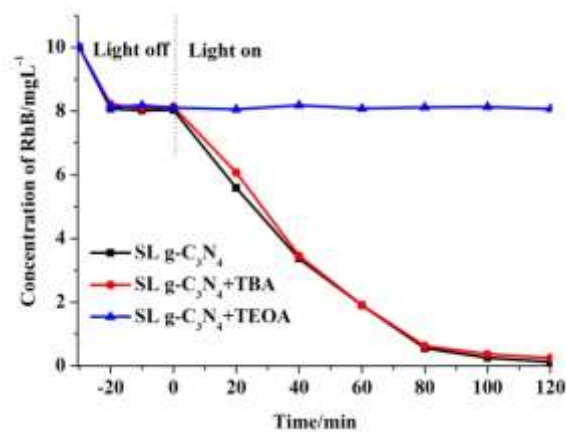

Figure S7 Photocatalytic degradation of RhB by SL  $\text{g-C}_3\text{N}_4$  with different scavengers under visible light irradiation ( $\lambda > 400$  nm).

#### 6 Photocatalytic degradation of phenol

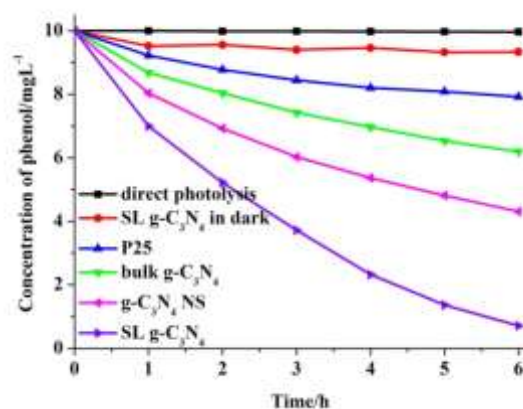

Figure S8 Photocatalytic degradation of phenol under visible light irradiation ( $\lambda > 400$  nm).

## References

- (1) Liao, G.; Chen, S. *J. Mater. Chem.* **2012**, *22*, 2721.
- (2) Thomas, A.; Fischer, A. *J. Mater. Chem.* **2008**, *18*, 4893.
